# Supplementary material for: ACC Glu/GABA ratio is decreased in euthymic bipolar disorder I patients: possible in vivo neurometabolite explanation for mood stabilization
Source: Springer Nature journal article supplement (doi:10.1007/s00406-020-01096-0), 2020-01-28
Supplement: MOESM2 [file 17602192]

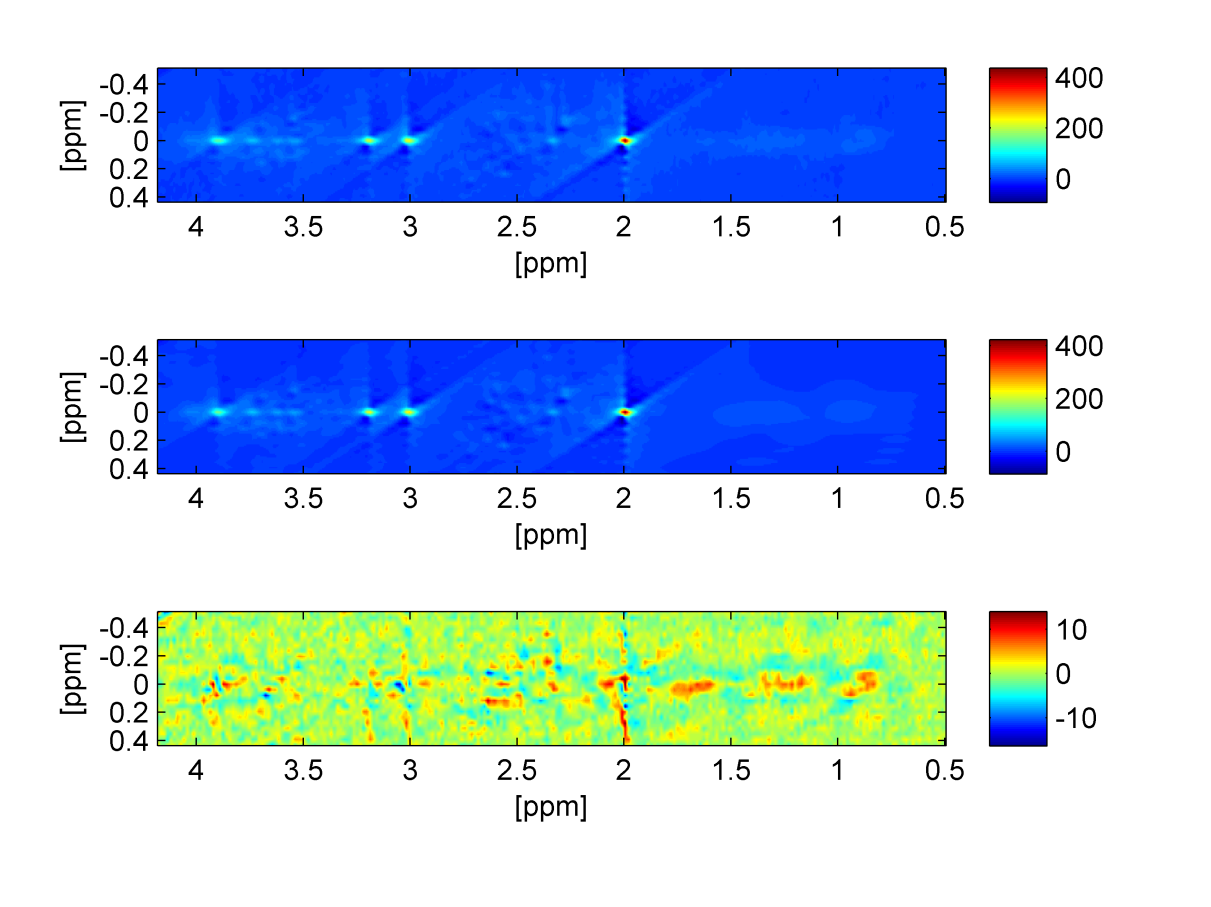


**Supplement Figure 1**: An example of a two-dimensional JPRESS spectrum of the ACC in a BD subject (top), its fitted spectrum (middle), and the residual of the fit (bottom). Note that the color scale is amplified x20 in the residual.
