# Supplementary material for: ACC Glu/GABA ratio is decreased in euthymic bipolar disorder I patients: possible in vivo neurometabolite explanation for mood stabilization
Source: Springer Nature journal article supplement (doi:10.1007/s00406-020-01096-0), 2020-01-28
Supplement: MOESM3 [file 17602192]

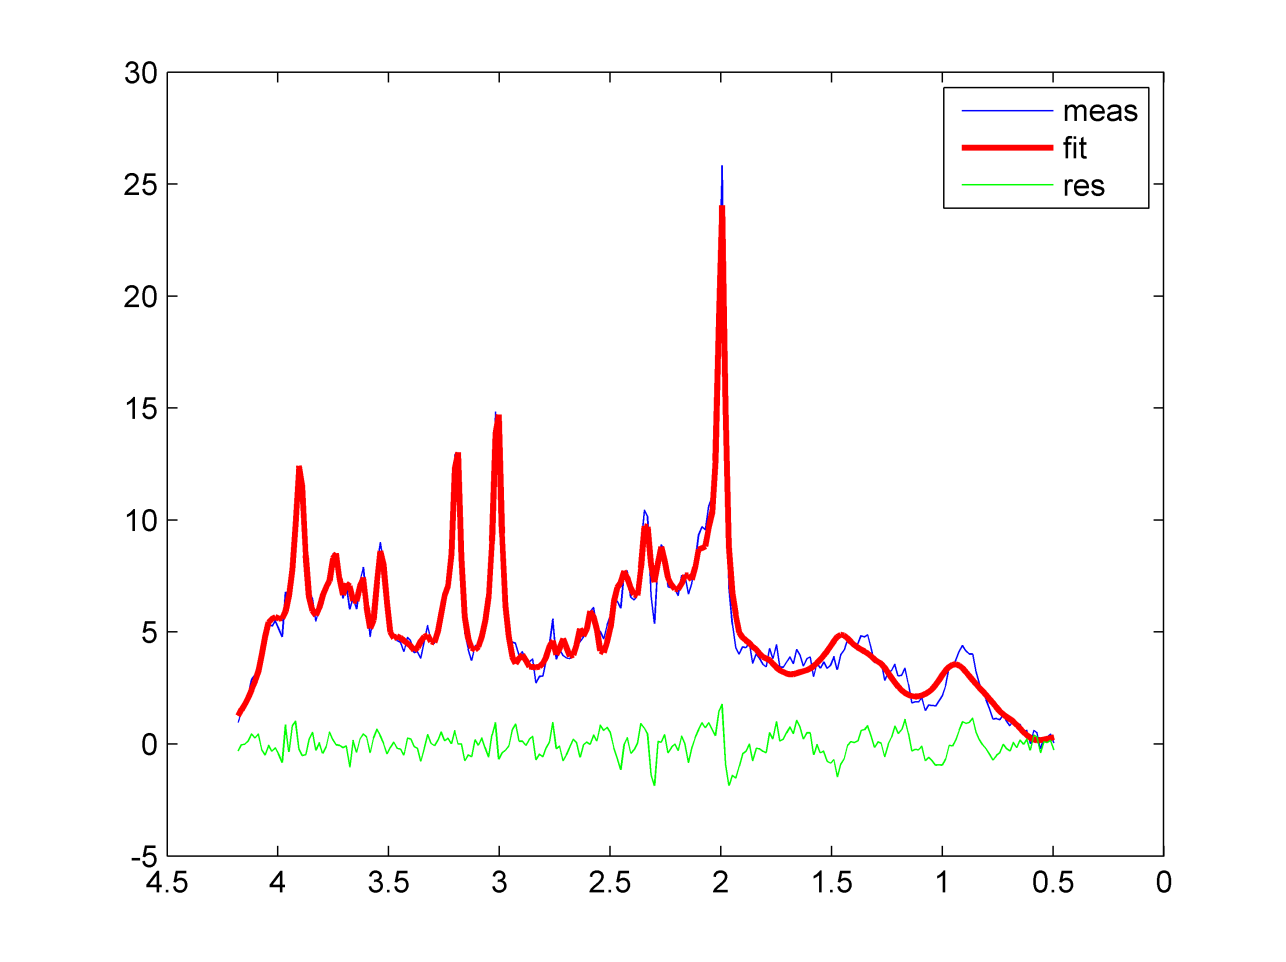


**Supplement Figure 2**: One-dimensional projection of the acquired JPRESS spectrum displayed in Figure 1. Measured spectrum in blue, fitted in red and residual in green.
